# Supplementary material
Source: PubMed Central journal article supplement (PMC7249221)
Supplement: NIHMS1571523-supplement-Appendix.pdf [file NIHMS1571523-supplement-Appendix.pdf]

# Using community health workers to deliver a scalable integrated parenting program in rural China: a cluster-randomized controlled trial

## Web appendix

**Table A.1: Baseline characteristics of intention-to-treat population**

|                                      |       | Control<br>(n=227) | Intervention<br>(n=222) | P-value |
|--------------------------------------|-------|--------------------|-------------------------|---------|
| <b>Children</b>                      |       |                    |                         |         |
| Age (months)                         |       | 13 (10-16)         | 13 (10-15)              | 0.76    |
| Sex                                  |       |                    |                         |         |
|                                      | Girls | 98 (43%)           | 112 (50%)               | 0.12    |
|                                      | Boys  | 129 (57%)          | 110 (50%)               |         |
| Premature                            |       |                    |                         |         |
|                                      | Yes   | 8 (4%)             | 11 (5%)                 | 0.57    |
|                                      | No    | 219 (96%)          | 211 (95%)               |         |
| Ethnic minority                      |       |                    |                         |         |
|                                      | Yes   | 47 (21%)           | 54 (24%)                | 0.38    |
|                                      | No    | 180 (79%)          | 168 (76%)               |         |
| First born                           |       |                    |                         |         |
|                                      | Yes   | 96 (42%)           | 98 (44%)                | 0.62    |
|                                      | No    | 131 (58%)          | 124 (56%)               |         |
| <b>Mothers</b>                       |       |                    |                         |         |
| Age (years)                          |       | 28 (25-31)         | 28 (24-31)              | 0.28    |
| Mother is currently living at home   |       |                    |                         |         |
|                                      | Yes   | 203 (89%)          | 196 (88%)               | 0.63    |
|                                      | No    | 24 (11%)           | 26 (12%)                |         |
| Education > 9 years                  |       |                    |                         |         |
|                                      | Yes   | 71 (31%)           | 55 (25%)                | 0.23    |
|                                      | No    | 156 (69%)          | 167 (75%)               |         |
| <b>Households</b>                    |       |                    |                         |         |
| Social security household            |       |                    |                         |         |
|                                      | Yes   | 27 (12%)           | 29 (13%)                | 0.78    |
|                                      | No    | 200 (88%)          | 193 (87%)               |         |
| Household income (in '000 USD/ year) |       | 4.8 (3.5)          | 5.4 (3.8)               | 0.06    |

Data are mean (SD), n (%), or median (IQR). P-values for difference in means across control and intervention group are adjusted for clustering at the village level.

**Table A.2: Baseline parenting knowledge and skills**

|                                                                                                                                                                    | <b>Control<br/>(n=227)</b> | <b>Intervention<br/>(n=222)</b> | <b>P-value</b> |
|--------------------------------------------------------------------------------------------------------------------------------------------------------------------|----------------------------|---------------------------------|----------------|
| <b>Child psychosocial stimulation</b>                                                                                                                              |                            |                                 |                |
| Able to recognize child's need for interactive reading activities                                                                                                  | 117 (52%)                  | 129 (58%)                       | 0.39           |
| Able to recognize child's need for interactive play activities                                                                                                     | 167 (74%)                  | 170 (77%)                       | 0.47           |
| Knows how to read to child                                                                                                                                         | 127 (56%)                  | 114 (51%)                       | 0.30           |
| Knows how to play with child                                                                                                                                       | 150 (66%)                  | 155 (70%)                       | 0.42           |
| <b>Child feeding</b>                                                                                                                                               |                            |                                 |                |
| Knows that from 6 months onwards solid foods should be given to infant                                                                                             | 134 (59%)                  | 133 (60%)                       | 0.86           |
| Knows that between 6-12 months breastmilk and formula milk are still the main source of energy and nutrition                                                       | 180 (79%)                  | 163 (73%)                       | 0.11           |
| Knows that a diet for 6-12 month olds is more balanced if the child eats fruit, vegetables or flesh foods in addition to breastmilk/formula milk and staple foods. | 81 (36%)                   | 76 (34%)                        | 0.63           |
| Knows that a micronutrient deficiency affects infant health                                                                                                        | 212 (93%)                  | 190 (86%)                       | 0.09           |
| Knows that a micronutrient deficiency affects infant cognitive development                                                                                         | 183 (81%)                  | 166 (75%)                       | 0.20           |
| Lower responsiveness of the child is a sign of a micronutrient deficiency                                                                                          | 138 (61%)                  | 135 (61%)                       | 0.85           |
| Acknowledges the importance of giving trace or vitamin supplements to infant in case of a deficiency                                                               | 173 (76%)                  | 166 (75%)                       | 0.99           |

Data are n (%). P-values for difference in means across control and intervention group are adjusted for clustering at the village level.

**Table A.3: Baseline parenting practices**

|                                                         |     | Control<br>(n=227) | Intervention<br>(n=222) | P-value |
|---------------------------------------------------------|-----|--------------------|-------------------------|---------|
| <b>Stimulating parenting practices</b>                  |     |                    |                         |         |
| Caregiver used toys to play with child over past 2 days | Yes | 130 (57%)          | 136 (61%)               | 0.31    |
|                                                         | No  | 97 (43%)           | 86 (39%)                |         |
| Caregiver sang song to child over past 2 days           | Yes | 88 (39%)           | 74 (33%)                | 0.48    |
|                                                         | No  | 139 (61%)          | 148 (67%)               |         |
| Caregiver told story to child over past 2 days          | Yes | 33 (15%)           | 29 (13%)                | 0.83    |
|                                                         | No  | 194 (85%)          | 193 (87%)               |         |
| Caregiver read book to child over past 2 days           | Yes | 13 (6%)            | 12 (5%)                 | 0.94    |
|                                                         | No  | 214 (94%)          | 210 (95%)               |         |
| No. of children's books in household                    |     | 2.0 (4.8)          | 1.8 (7.3)               | 0.94    |
| <b>Feeding practices</b>                                |     |                    |                         |         |
| Has ever been breastfed                                 | Yes | 206 (92%)          | 212 (96%)               | 0.14    |
|                                                         | No  | 21 (8%)            | 9 (4%)                  |         |
| Initiation of breastfeeding within 1 hour after birth   | Yes | 35 (16%)           | 22 (10%)                | 0.15    |
|                                                         | No  | 191 (84%)          | 200 (90%)               |         |
| Continued breastfeeding after 6 months                  | Yes | 190 (84%)          | 190 (86%)               | 0.80    |
|                                                         | No  | 37 (16%)           | 32 (14%)                |         |
| Has ever eaten formula milk                             | Yes | 146 (65%)          | 152 (68%)               | 0.36    |
|                                                         | No  | 80 (35%)           | 70 (32%)                |         |
| How many months exclusively breastfed?                  |     | 1.6 (2.6)          | 1.2 (2.3)               | 0.05    |
| How many months exclusively fed formula milk?           |     | 4.2 (5.0)          | 4.9 (5.3)               | 0.11    |
| At what age (months) complementary feeding started?     |     | 6.3 (1.7)          | 5.9 (1.4)               | 0.01    |
| Minimum dietary diversity*                              | Yes | 135 (60%)          | 123 (55%)               | 0.49    |
|                                                         | No  | 91 (40%)           | 99 (45%)                |         |
| Minimum meal frequency                                  | Yes | 64 (28%)           | 64 (29%)                | 0.86    |
|                                                         | No  | 162 (72%)          | 158 (71%)               |         |

Data are mean (SD), n (%), or median (IQR). P-values for difference in means across control and intervention group are adjusted for clustering at the village level.

In line with the WHO, 'minimum dietary diversity' = 1 if the child received foods from 4 or more food groups on the previous day. This minimum dietary diversity indicator was calculated based on the consumption of at least four out of the following seven food groups: (1) grains, roots and tubers; (2) legumes and nuts; (3) dairy products; (4) flesh foods; (5) eggs; (6) vitamin A-rich fruits and vegetables; and (7) other fruits and vegetables. 'Minimum meal frequency' = 1 for breastfed children age 6-8 months fed more than twice on the previous day, for breastfed children of age 9 months and older fed more than 3 times per day, and for non-breastfed children over 6 months of age receiving at least 1 cup of milk and 4 meals per day.

**Table A.4: Baseline ECD outcomes of non-attributed intention-to-treat population**

|                                                       |     | Control<br>(n=200) | Intervention<br>(n=190) | P-value |
|-------------------------------------------------------|-----|--------------------|-------------------------|---------|
| <b>Child development<sup>#</sup></b>                  |     |                    |                         |         |
| Cognition score                                       |     | 41.6 (8.6)         | 40.5 (7.9)              | 0.34    |
| Receptive language score                              |     | 14.0 (4.3)         | 13.9 (4.1)              | 0.90    |
| Expressive language score                             |     | 14.1 (5.1)         | 13.7 (5.0)              | 0.81    |
| Fine motor score                                      |     | 29.0 (5.6)         | 28.8 (4.9)              | 0.99    |
| Gross motor score                                     |     | 41.1 (10.6)        | 40.5 (9.5)              | 0.92    |
| Social-emotional score                                |     | 69.2 (13.4)        | 68.5 (12.7)             | 0.99    |
| <b>Child health</b>                                   |     |                    |                         |         |
| Diarrhea in past month                                |     |                    |                         |         |
|                                                       | Yes | 55 (27%)           | 39 (21%)                | 0.18    |
|                                                       | No  | 145 (73%)          | 151 (79%)               |         |
| Symptoms of respiratory tract infection in past month |     |                    |                         |         |
|                                                       | Yes | 115 (57%)          | 103 (54%)               | 0.69    |
|                                                       | No  | 85 (43%)           | 87 (46%)                |         |
| Number of times ill in past month                     |     | 1.0 (0.9)          | 0.8 (0.8)               | 0.20    |
| <b>Child nutrition and growth</b>                     |     |                    |                         |         |
| Hemoglobin (g/L) <sup>§</sup>                         |     | 105.7 (94.0-118.0) | 107.5 (98.0-118.0)      | 0.61    |
| Anemic <sup>§</sup>                                   |     |                    |                         |         |
|                                                       | Yes | 110 (56%)          | 96 (52%)                | 0.82    |
|                                                       | No  | 85 (44%)           | 87 (48%)                |         |
| Height (cm) <sup>*</sup>                              |     | 76.2 (72.5-80.0)   | 75.5 (72.0-79.0)        | 0.34    |
| Weight (kg) <sup>*</sup>                              |     | 9.7 (8.6-10.7)     | 9.6 (8.6-10.4)          | 0.96    |
| Weight for age <sup>*</sup>                           |     | 0.14 (1.11)        | 0.12 (1.09)             | 0.50    |
| Length/height for age <sup>*</sup>                    |     | 0.21 (1.23)        | 0.02 (1.29)             | 0.37    |
| Weight for length/height <sup>*</sup>                 |     | 0.09 (1.18)        | 0.17 (1.11)             | 0.20    |

Data are mean (SD), n (%), or median (IQR). P-values for difference in means across control and intervention group are adjusted for clustering at the village level.

'Anemic' is a dummy variable = 1 if altitude-adjusted hemoglobin concentration < 110 g/L. 'Underweight' is a dummy variable = 1 if child's weight-for-age z-score is more than two SD below the mean of the WHO reference population.

<sup>#</sup> Expressed in Bayley-III raw scores. Baseline Bayley-III scores are missing for 1 child.

<sup>§</sup> Hemoglobin values are missing for 15 children at baseline.

<sup>\*</sup> Height and weight are missing for 9 children.

**Table A.5: Estimated effects of intervention on psychosocial stimulation**

| Outcomes                                                          | Intervention |                   |         | Mean of control group at follow-up |
|-------------------------------------------------------------------|--------------|-------------------|---------|------------------------------------|
|                                                                   | No.          | $\beta$ (95% CI)  | P-value |                                    |
| <b>Panel A: Caregiver's beliefs and skills</b>                    |              |                   |         |                                    |
| <b>Summary index<sup>§</sup></b>                                  | 388          | 0.25 (0.07-0.44)  | 0.007   | -0.13                              |
| Recognizes importance of interactive reading activities           | 389          | 0.07 (-0.03-0.17) | 0.14    | 0.51                               |
| Recognizes importance of interactive parent-child play activities | 389          | 0.06 (-0.01-0.14) | 0.10    | 0.73                               |
| Know how to read to child                                         | 390          | 0.12 (0.02-0.22)  | 0.02    | 0.44                               |
| Know how to play with child                                       | 390          | 0.05 (-0.05-0.15) | 0.31    | 0.64                               |
| <b>Panel B: Caregiver's investment</b>                            |              |                   |         |                                    |
| <b>Summary index<sup>§</sup></b>                                  | 387          | 0.35 (0.18-0.52)  | <0.001  | -0.15                              |
| Used toys to play                                                 | 387          | 0.14 (0.02-0.26)  | 0.02    | 0.44                               |
| Told story                                                        | 387          | 0.09 (-0.01-0.19) | 0.06    | 0.16                               |
| Read book                                                         | 387          | 0.08 (-0.02-0.18) | 0.12    | 0.09                               |
| Sang song                                                         | 387          | 0.05 (-0.02-0.13) | 0.17    | 0.31                               |
| No. of children's books at home                                   | 387          | 1.22 (-0.27-2.71) | 0.10    | 3.36                               |
| Play area for child                                               | 387          | 0.11 (0.03-0.19)  | 0.005   | 0.29                               |

<sup>§</sup> In panel A, 'summary index' is the weighted average of the measures in rows 2-5. In panel B, 'summary index' is the weighted average of the measures in rows 2-7.

The variables in rows 2-5 of panel A are dummy variables equal to 1 if the respondent gave a score above 4 on a 7-point Likert scale. The variables in rows 2-5 and row 7 of panel B are dummy variables equal to 1 if the respondent gave reported that he engaged in this activity on the day before.

When we use the Romano-Wolf stepdown procedure to adjust the p-values of all variables (except for the summary indices) for the family-wise error rate, the ITT effects on the probability that a child had a play area remains significant at the 5% level.

**Table A.6: Estimated effects of intervention on health promotion**

| Outcomes                                            | Intervention |                    |         | Mean of control group at follow-up |
|-----------------------------------------------------|--------------|--------------------|---------|------------------------------------|
|                                                     | No.          | $\beta$ (95% CI)   | P-value |                                    |
| <b>Panel A: Dietary diversity</b>                   |              |                    |         |                                    |
| Minimum dietary diversity*                          | 389          | 0.03 (-0.03-0.10)  | 0.30    | 0.85                               |
| Iron rich foods index**                             | 384          | 0.23 (0.01-0.46)   | 0.04    | -0.04                              |
| Dietary diversity index <sup>§</sup>                | 389          | 0.12 (-0.08-0.32)  | 0.22    | -0.01                              |
| Any grains, roots or tubers                         | 389          | -0.01 (-0.03-0.02) | 0.61    | 0.99                               |
| Any legumes or nuts                                 | 389          | 0.02 (-0.09-0.13)  | 0.76    | 0.59                               |
| Any dairy products                                  | 389          | 0.01 (-0.09-0.11)  | 0.86    | 0.52                               |
| Any flesh foods                                     | 389          | 0.03 (-0.06-0.11)  | 0.55    | 0.69                               |
| Any eggs                                            | 389          | -0.05 (-0.14-0.03) | 0.19    | 0.64                               |
| Any vitamin-A rich fruits or vegetables             | 389          | 0.03 (-0.05-0.11)  | 0.49    | 0.73                               |
| Any other fruits or vegetables                      | 389          | 0.07 (-0.02-0.17)  | 0.12    | 0.82                               |
| <b>Panel B: Meal frequency</b>                      |              |                    |         |                                    |
| Minimum meal frequency*                             | 389          | -0.03 (-0.08-0.02) | 0.27    | 0.13                               |
| Meal frequency index <sup>§</sup>                   | 389          | 0.12 (-0.12-0.36)  | 0.30    | -0.05                              |
| Number of times breastfed                           | 389          | -0.23 (-0.60-0.15) | 0.22    | 0.60                               |
| Number of times fed fresh milk                      | 389          | 0.11 (-0.11-0.34)  | 0.30    | 0.51                               |
| Number of times fed soft, semi-solid or solid foods | 389          | 0.04 (-0.14-0.22)  | 0.65    | 2.67                               |
| <b>Panel C: Nutritional supplementation</b>         |              |                    |         |                                    |
| Nutrition supplementation index <sup>§</sup>        | 384          | 0.12 (-0.08-0.32)  | 0.23    | -0.04                              |
| Iron supplements                                    | 384          | 0.04 (-0.04-0.13)  | 0.30    | 0.19                               |
| Zinc supplements                                    | 385          | 0.06 (-0.04-0.17)  | 0.22    | 0.32                               |
| Calcium supplements                                 | 389          | 0.03 (-0.06-0.13)  | 0.45    | 0.58                               |

\* In line with the WHO, 'minimum dietary diversity' = 1 if the child received foods from 4 or more food groups (see rows 4-10) on the previous day. 'Minimum meal frequency' = 1 for breastfed children age 6-8 months fed more than twice on the previous day, for breastfed children of age 9 months and older fed more than 3 times per day, and for non-breastfed children over 6 months of age receiving at least 1 cup of milk and 4 meals per day.<sup>28</sup>

\*\* 'Iron rich foods index' is the weighted average of the measures in row 5, 7, 9, and 10 of panel A and row 2 of panel C.

<sup>§</sup> 'Summary index' of dietary diversity in panel A is the weighted average of the measures in row 4-10 of panel A. 'Summary index' of meal frequency in panel B is the weighted average of the items in row 3-5 of panel B. 'Summary index' of supplementation in panel C is the weighted average of the variables in row 2-4 of panel C.

The variables in row 4-10 of panel A are dummy variables equal to 1 if the corresponding food was consumed by the child on the day prior to the survey. The variables in row 3-5 in panel B are the number of feedings on the day before. The variables in row 2-4 of panel C are dummy variables equal to 1 if the corresponding nutritional supplement was given to the child during the year.

When we use the Romano-Wolf stepdown procedure to adjust the p-values of all variables (except for the summary indices) for the family-wise error rate, no ITT effects on non-aggregated outcomes remain significant at the 5% level.

**Table A.7: Dose-response relationships**

|                        | Panel A:<br>Skill development index |                    | Panel B:<br>Health index |                   |
|------------------------|-------------------------------------|--------------------|--------------------------|-------------------|
|                        | (1)                                 | (2)                | (1)                      | (2)               |
| HH Visits              | 0.010**<br>(0.005)                  | 0.018<br>(0.061)   | 0.019***<br>(0.005)      | 0.114<br>(0.072)  |
| HH Visits <sup>2</sup> |                                     | -0.0004<br>(0.003) |                          | -0.005<br>(0.004) |
| Observations           | 385                                 | 385                | 390                      | 390               |
| R <sup>2</sup>         | 0.33                                | 0.33               | 0.04                     | 0.05              |

Column (1) gives a control function estimate of the treatment effect of one household visit, assuming a linear relationship between the number of household visits and the child's development. Column (2) gives control function estimates of the treatment effect of one household visit, assuming a concave relationship. Residuals used in the control function estimation are derived from regressing the number of household visits on treatment status, the distance to the village committee, and the interaction between treatment status and the distance to the village committee. In all regressions we control for province fixed effects. For the estimation of dose-response effects on the skill development index, we also included tester fixed effects. All standard errors are clustered at the village level. P-values for two-tailed tests are computed for each coefficient using the cluster-correlated Huber-White estimator.

\*  $p < 0.10$ , \*\*  $p < 0.05$ , \*\*\*  $p < 0.01$ .
